# Supplementary material
Source: PubMed Central journal article supplement (PMC2842149)
Supplement: M001487_1.pdf [file M001487_1.pdf]

**Supplemental Table 1. Distribution of lipids and non-cholesterol sterol levels by baseline campesterol/TC quartiles**

| Characteristics                             | Campesterol/TC quartiles |              |              |              | p                    |
|---------------------------------------------|--------------------------|--------------|--------------|--------------|----------------------|
|                                             | Q1<br>N= 148             | Q2<br>N= 147 | Q3<br>N= 149 | Q4<br>N= 147 |                      |
| Age, years                                  | 46.6 ± 9.3               | 46.9 ± 8.8   | 44.3 ± 9.0   | 46.1 ± 9.6   | P=0.074              |
| Male sex, n (%)                             | 60 (40.5)                | 78 (53.1)    | 85 (57.0)    | 83 (56.5)    | P= 0.014             |
| BMI, kg/m <sup>2</sup>                      | 29.0 ± 5.1               | 27.8 ± 4.5   | 26.5 ± 4.1   | 25.7 ± 3.5   | P<0.001              |
| Total cholesterol, mmol/l                   | 10.1 ± 1.78              | 10.50 ± 1.90 | 10.12 ± 1.74 | 10.62 ± 1.91 | P=0.032              |
| LDL cholesterol, mmol/l                     | 7.96 ± 1.75              | 8.36 ± 1.84  | 8.05 ± 1.63  | 8.59 ± 1.81  | P=0.007              |
| HDL cholesterol, mmol/l                     | 1.19 ± 0.30              | 1.17 ± 0.27  | 1.21 ± 0.31  | 1.22 ± 0.30  | P=0.487              |
| Triglycerides, mmol/l                       | 2.18 ± 1.09              | 2.19 ± 1.05  | 1.96 ± 1.18  | 1.83 ± 0.97  | P=0.002              |
| Sitosterol, mg/dl                           | 0.33 ± 0.10              | 0.48 ± 0.13  | 0.56 ± 0.15  | 0.85 ± 0.28  | P<0.001              |
| Campesterol, mg/dl                          | 0.40 ± 0.11              | 0.62 ± 0.13  | 0.81 ± 0.16  | 1.32 ± 0.46  | P<0.001              |
| Lathosterol, mg/dl                          | 0.54 ± 0.20              | 0.54 ± 0.21  | 0.54 ± 0.24  | 0.48 ± 0.17  | P=0.049              |
| Sitosterol/TC ratio, µg/mg                  | 0.84 ± 0.22              | 1.18 ± 0.26  | 1.44 ± 0.33  | 2.08 ± 0.59  | P<0.001              |
| Campesterol/TC ratio, µg/mg                 | 1.01 ± 0.22              | 1.54 ± 0.13  | 2.08 ± 0.19  | 3.22 ± 0.90  | P<0.001              |
| Lathosterol/TC ratio, µg/mg                 | 1.41 ± 0.51              | 1.33 ± 0.47  | 1.36 ± 0.55  | 1.19 ± 0.41  | P<0.001              |
| <b>Simvastatin 80mg, N=289</b>              | <b>N=82</b>              | <b>N=70</b>  | <b>N=68</b>  | <b>N=69</b>  |                      |
| Change in LDL-C, mmol/l                     | -2.86 ± 1.06             | -3.31 ± 1.45 | -3.66 ± 1.59 | -3.90 ± 1.56 | p=0.420 <sup>a</sup> |
| <b>Ezetimibe/simvastatin 10/80mg, N=302</b> | <b>N=66</b>              | <b>N=77</b>  | <b>N=81</b>  | <b>N=78</b>  |                      |
| Change in LDL-C, mmol/l                     | -4.19 ± 1.05             | -4.56 ± 1.42 | -5.00 ± 1.23 | -5.39 ± 1.70 | p=0.535 <sup>a</sup> |

Data are presented as mean ± SD, median [range] or number (%) per quartile. P indicates P for linearity between campesterol/TC quartiles and study parameters.

Associations of quartiles with baseline parameters were evaluated by means of ANOVA.

Associations of quartiles in the different treatment arms were evaluated by means of linear regression, <sup>a</sup> adjusted for baseline LDL-C

**Supplemental Table 2. Distribution of lipids and non-cholesterol sterol levels by baseline lathosterol/TC quartiles**

| Characteristics                             | Lathosterol/TC quartiles |              |              |              | p                    |
|---------------------------------------------|--------------------------|--------------|--------------|--------------|----------------------|
|                                             | Q1<br>N= 148             | Q2<br>N=147  | Q3<br>N= 148 | Q4<br>N=148  |                      |
| Age, years                                  | 46.2 ± 9.4               | 45.4 ± 9.3   | 46.6 ± 9.1   | 45.6 ± 9.2   | P=0.665              |
| Male sex, n (%)                             | 63 (42.6)                | 75 (51.0)    | 80 (54.1)    | 88 (59.5)    | P= 0.031             |
| BMI, kg/m <sup>2</sup>                      | 25.01 ± 3.6              | 26.8 ± 4.4   | 27.8 ± 4.0   | 29.3 ± 4.8   | P<0.001              |
| Total cholesterol, mmol/l                   | 10.49 ± 1.87             | 10.44 ± 1.86 | 10.36 ± 1.83 | 10.06 ± 1.80 | P=0.185              |
| LDL cholesterol, mmol/l                     | 8.47 ± 1.79              | 8.36 ± 1.79  | 8.27 ± 1.71  | 7.85 ± 1.76  | P=0.015              |
| HDL cholesterol, mmol/l                     | 1.27 ± 0.30              | 1.23 ± 0.29  | 1.18 ± 0.28  | 1.11 ± 0.30  | P<0.001              |
| Triglycerides, mmol/l                       | 1.70 ± 0.95              | 1.87 ± 0.92  | 2.03 ± 1.02  | 2.54 ± 1.24  | P<0.001              |
| Sitosterol, mg/dl                           | 0.64 ± 0.30              | 0.58 ± 0.26  | 0.54 ± 0.22  | 0.46 ± 0.22  | P<0.001              |
| Campesterol, mg/dl                          | 0.87 ± 0.51              | 0.83 ± 0.45  | 0.78 ± 0.37  | 0.67 ± 0.33  | P<0.001              |
| Lathosterol, mg/dl                          | 0.31 ± 0.09              | 0.45 ± 0.08  | 0.57 ± 0.11  | 0.77 ± 0.18  | P<0.001              |
| Sitosterol/TC ratio, µg/mg                  | 1.58 ± 0.65              | 1.44 ± 0.60  | 1.35 ± 0.54  | 1.16 ± 0.49  | P<0.001              |
| Campesterol/TC ratio, µg/mg                 | 2.14 ± 1.08              | 2.05 ± 0.98  | 1.96 ± 0.88  | 1.69 ± 0.76  | P<0.001              |
| Lathosterol/TC ratio, µg/mg                 | 0.76 ± 0.17              | 1.12 ± 0.08  | 1.43 ± 0.10  | 1.98 ± 0.35  | P<0.001              |
| <b>Simvastatin 80mg, N=289</b>              | <b>N=66</b>              | <b>N=74</b>  | <b>N=74</b>  | <b>N=75</b>  |                      |
| Change in LDL-C, mmol/l                     | -3.22 ± 0.97             | -3.13 ± 1.73 | -3.40 ± 1.38 | -3.89 ± 1.49 | p=0.593 <sup>a</sup> |
| <b>Ezetimibe/simvastatin 10/80mg, N=302</b> | <b>N=82</b>              | <b>N=73</b>  | <b>N=74</b>  | <b>N=73</b>  |                      |
| Change in LDL-C, mmol/l                     | -4.42 ± 1.36             | -4.83 ± 1.27 | -4.88 ± 1.39 | -5.20 ± 1.60 | p=0.136 <sup>a</sup> |

Data are presented as mean ± SD, median [range] or number (%) per quartile. P indicates P for linearity between lathosterol/TC quartiles and study parameters.

Associations of quartiles with baseline parameters were evaluated by means of ANOVA.

Associations of quartiles in the different treatment arms were evaluated by means of linear regression, <sup>a</sup> adjusted for baseline LDL-C
